# Supplementary material
Source: PubMed Central journal article supplement (PMC6777075)
Supplement: ao9b02297_si_001.pdf [file ao9b02297_si_001.pdf]

# Supporting Information

## TiO<sub>2</sub> nanotubes for solar water splitting: Vacuum annealing and Zr doping enhance water oxidation kinetics

Maged N. Shaddad<sup>§, †</sup> Drialy Cardenas-Morcoso,<sup>§, ‡</sup> Miguel García-Tecedor,<sup>‡</sup>

Francisco Fabregat-Santiago,<sup>‡</sup> Juan Bisquert,<sup>‡</sup> Abdullah M. Al Mayouf,<sup>\*, †</sup> Sixto

Gimenez<sup>\*, ‡</sup>

<sup>†</sup>Electrochemical Sciences Research Chair (ESRC), Department of Chemistry,  
Science College, King Saud University, Riyadh, Saudi Arabia

<sup>‡</sup>Institute of Advanced Materials (INAM), Universitat Jaume I, 12006 Castelló, Spain

\*Email: [amayouf@ksu.edu.sa](mailto:amayouf@ksu.edu.sa), [sjulia@uji.es](mailto:sjulia@uji.es)

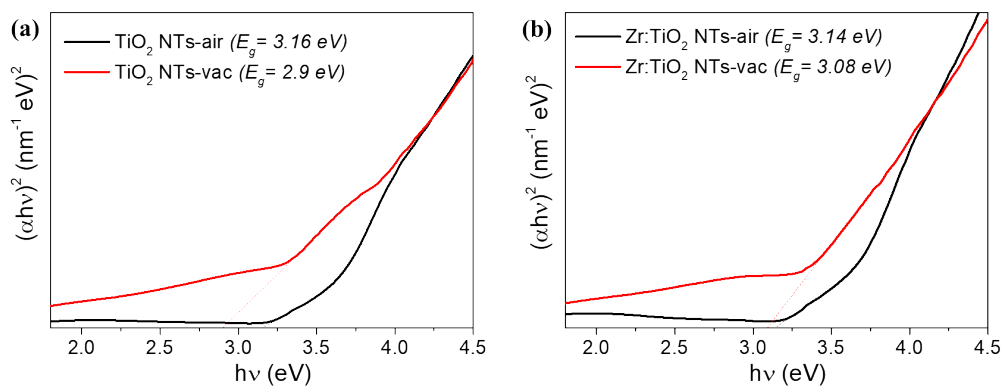

**Figure S1.** Tauc plots for direct optical transitions (a)  $\text{TiO}_2$  and (b)  $\text{Zr}:\text{TiO}_2$  NTs heat treated in different atmospheres. The derived bandgaps are showed in the corresponding plots.

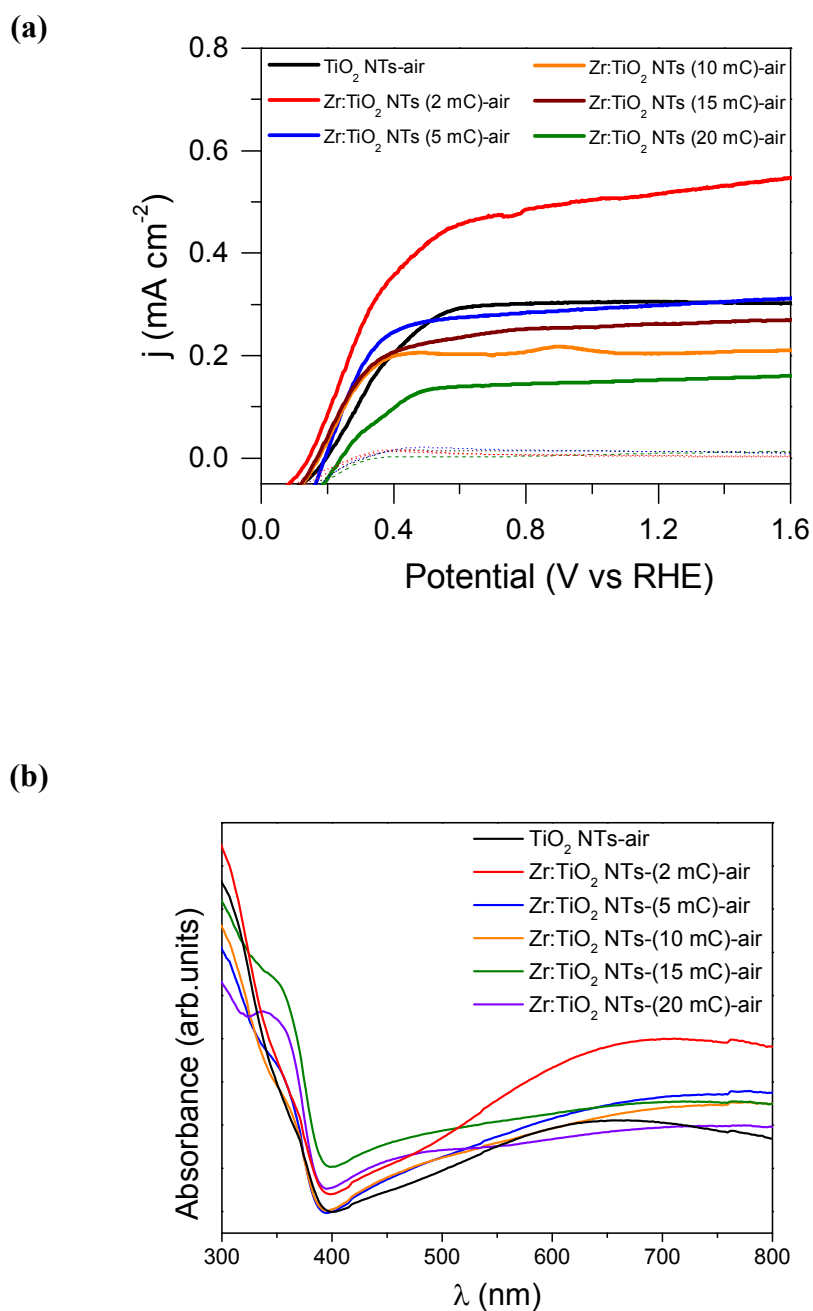

**Figure S2.-** (a) Photocurrents for water oxidation and (b) Absorbance spectra for undoped and Zr doped  $\text{TiO}_2$  nanotubes with different dopant additions under air atmosphere.

**Table S1.** Photocurrent obtained through integration of the IPCE spectra with the Solar Spectrum for the calculation of the integrated current.

| <b>Atmosphere</b> | <b>TiO<sub>2</sub> NTs</b> | <b>Zr:TiO<sub>2</sub> NTs</b> |
|-------------------|----------------------------|-------------------------------|
| <b>Air</b>        | 0.30 mA/cm <sup>2</sup>    | 0.53 mA/cm <sup>2</sup>       |
| <b>Vacuum</b>     | 0.44 mA/cm <sup>2</sup>    | 0.73 mA/cm <sup>2</sup>       |

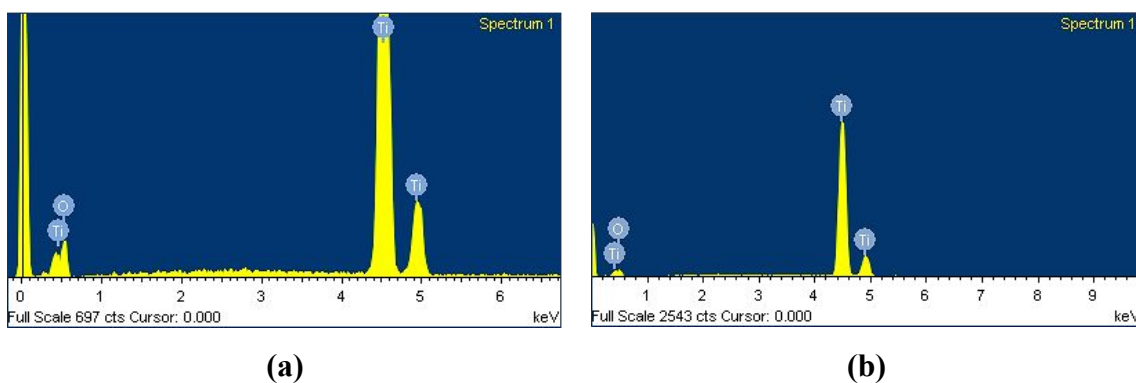

**Figure S3.-** EDS analyses of the (a) TiO<sub>2</sub> and (b) Zr:TiO<sub>2</sub> NTs.

**Supplementary Data Table S2.-** EDS analysis of the TiO<sub>2</sub> and Zr:TiO<sub>2</sub> NTs.

|                   | <b>TiO<sub>2</sub></b> | <b>Zr:TiO<sub>2</sub></b> |
|-------------------|------------------------|---------------------------|
| <b>Ti (at. %)</b> | 33.33                  | 33.33                     |
| <b>O (at. %)</b>  | 66.67                  | 66.67                     |

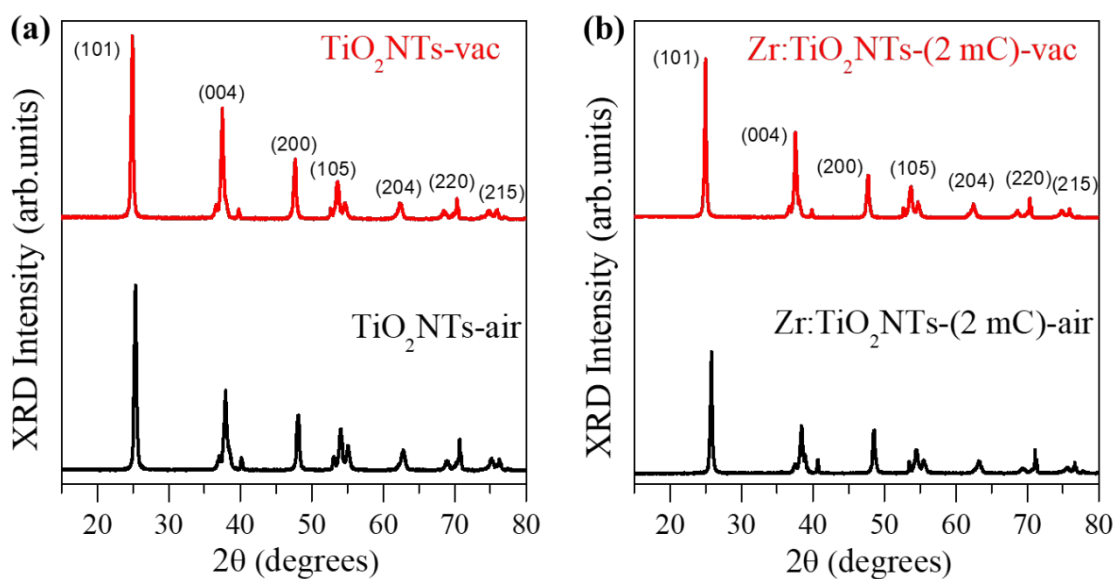

**Figure S4.-** X-rays diffractograms of  $\text{TiO}_2$  nanotubes heat treated at both air and vacuum atmospheres **(a)** bare  $\text{TiO}_2$  **(b)**  $\text{Zr}:\text{TiO}_2$  NTs

**Table S3.** hkl parameters for  $\text{TiO}_2$  samples with and with Zr addition under different thermal treatments. In all cases, the hkl parameters correspond to pure anatase.

| <i>hkl</i> | $\text{TiO}_2$ air (Å) | $\text{TiO}_2$ vacuum (Å) | $\text{TiO}_2$ Zr(2 mC) vacuum (Å) | $\text{TiO}_2$ Zr(15 mC) air (Å) |
|------------|------------------------|---------------------------|------------------------------------|----------------------------------|
| <b>101</b> | 3.5281                 | 3.5405                    | 3.5137                             | 3.4673                           |
| <b>400</b> | 2.3907                 | 2.3621                    | 2.3850                             | 2.3753                           |
| <b>200</b> | 1.9188                 | 1.9212                    | 1.8950                             | 1.9395                           |
| <b>105</b> | 1.6821                 | 1.6851                    | 1.6775                             | 1.6907                           |

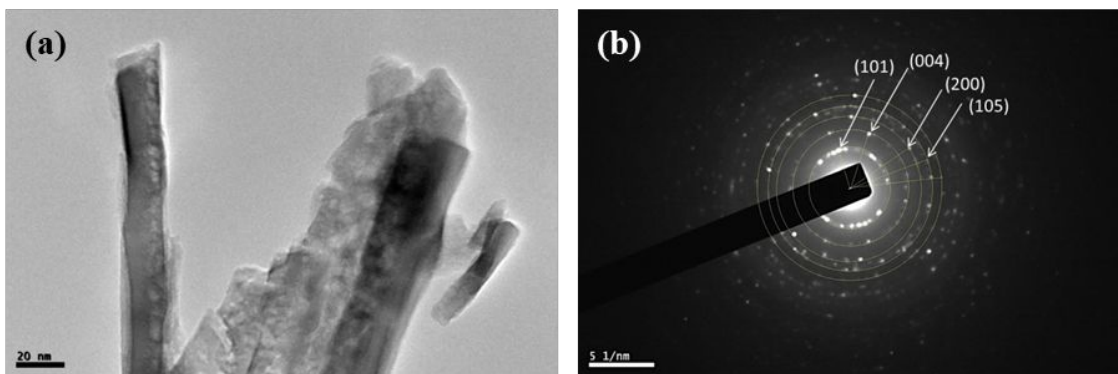

**Figure S5.-** (a) Representative TEM image of TiO<sub>2</sub> nanotubes and (b) SAED pattern of a TiO<sub>2</sub> 15 mC Zr sample.

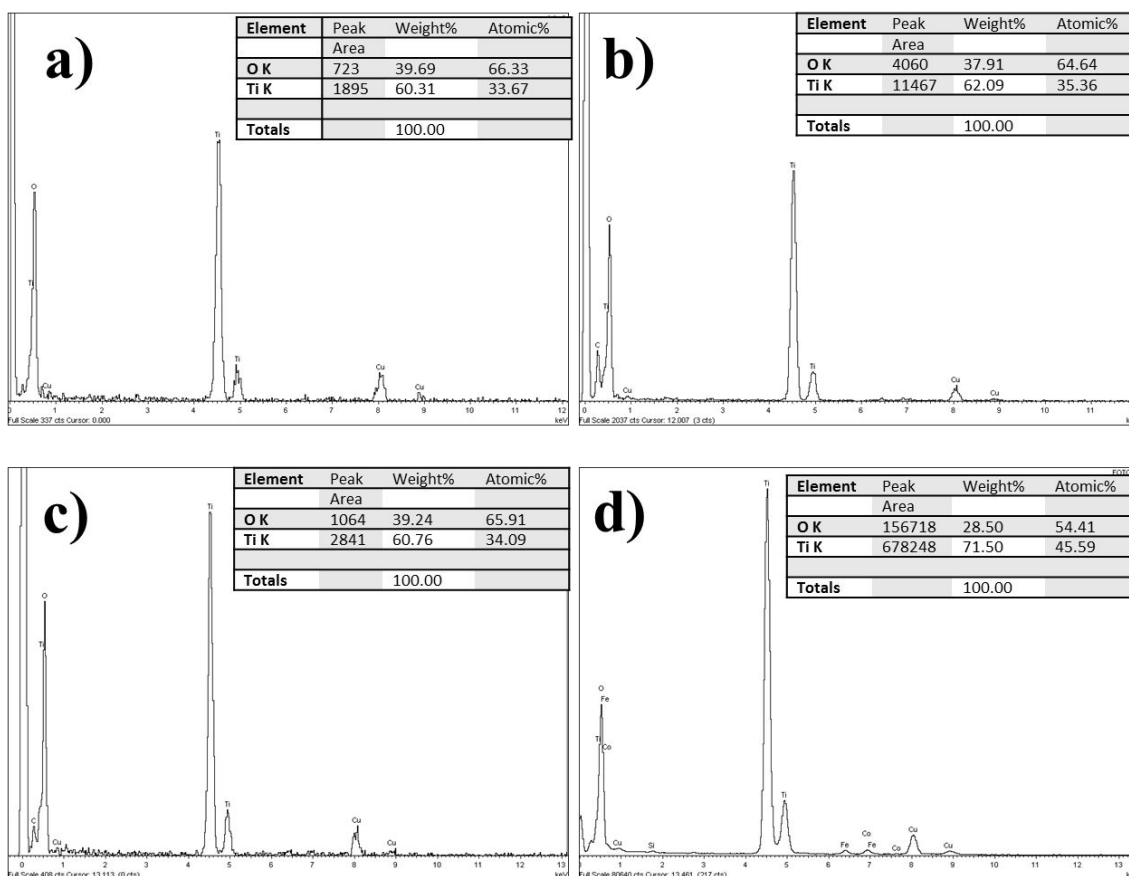

**Figure S6.** EDS analyses carried out by TEM on the samples (a) TiO<sub>2</sub> as prepared, (b) TiO<sub>2</sub> vacuum annealed, (c) TiO<sub>2</sub> 2 mC Zr vacuum annealed and (d) TiO<sub>2</sub> 15 mC Zr vacuum annealed.

**Table S4.** - XPS quantification carried out in the Zr:TiO<sub>2</sub> NTs samples under air and vacuum atmospheres.

| Element | Air (% at.) | Vacuum (% at.) |
|---------|-------------|----------------|
| O 1s    | 43.1        | 41.7           |
| Ti 2p   | 12.0        | 13.1           |
| Zr 3d   | 0.3         | 0.3            |

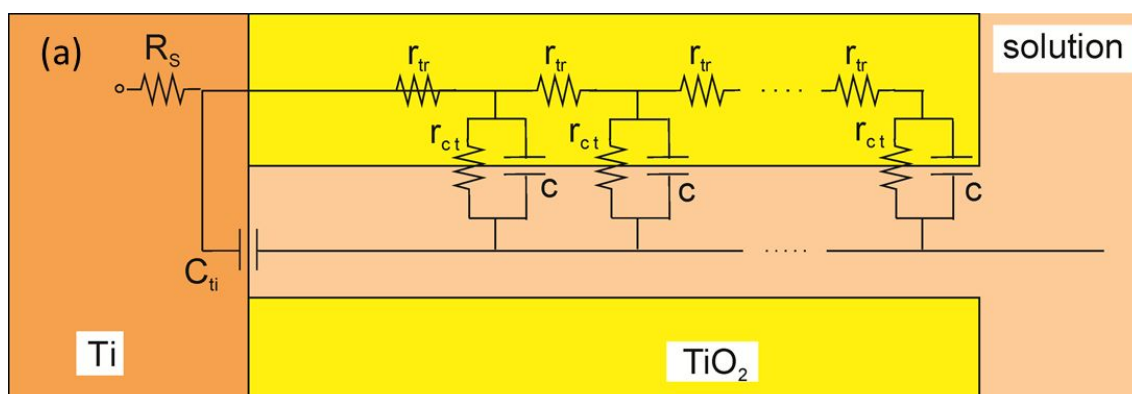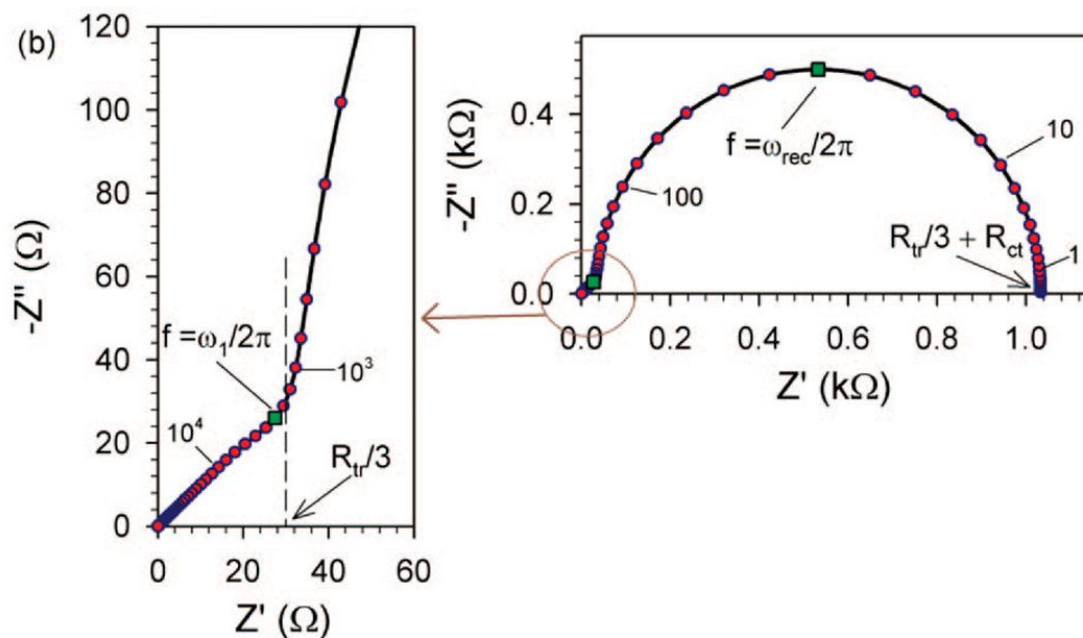

**Figure S7.**- (a) Equivalent circuit employed to fit the experimental impedance spectroscopy data. (b) Characteristic Nyquist plot of the nanotubes, with amplification of the high frequency region to show the 45 degree line related to transport resistance.

**Table S5:** Parameters extracted from the Mott-Schottky analysis showed in **Figure 5** of the main text.

|              |                                                         | <b>TiO<sub>2</sub><br/>NTs air</b> | <b>TiO<sub>2</sub> NTs<br/>vacuum</b> | <b>Zr:TiO<sub>2</sub><br/>NTs air</b> | <b>Zr:TiO<sub>2</sub><br/>NTs<br/>vacuum</b> |
|--------------|---------------------------------------------------------|------------------------------------|---------------------------------------|---------------------------------------|----------------------------------------------|
| <b>Dark</b>  | <b>V<sub>FB</sub> (V vs RHE)</b>                        | 0.11                               | 0.2                                   | 0.12                                  | 0.16                                         |
| <b>Dark</b>  | <b>N<sub>D</sub> (x10<sup>21</sup> cm<sup>-3</sup>)</b> | 1.9                                | 1.9                                   | 2.1                                   | 1.3                                          |
| <b>Light</b> | <b>V<sub>FB</sub> (V vs RHE)</b>                        | 0.14                               | 0.18                                  | 0.12                                  | 0.16                                         |
| <b>Light</b> | <b>N<sub>D</sub> (x10<sup>21</sup> cm<sup>-3</sup>)</b> | 2.1                                | 1.3                                   | 2.5                                   | 2.2                                          |

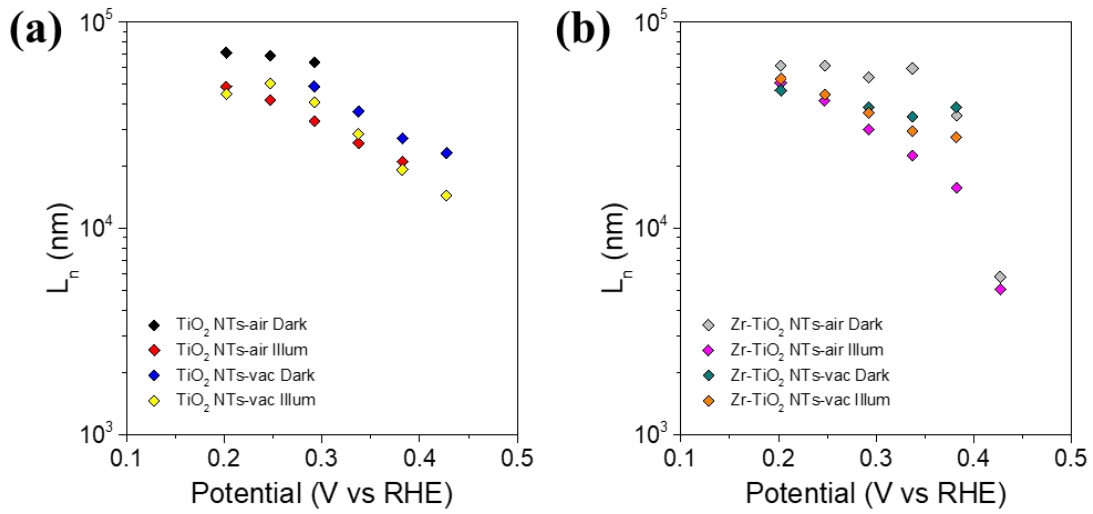

**Figure S8.-** Carrier diffusion length calculated for **(a)** undoped and **(b)** Zr doped TiO<sub>2</sub> nanotubes for samples thermally treated in air and vacuum.

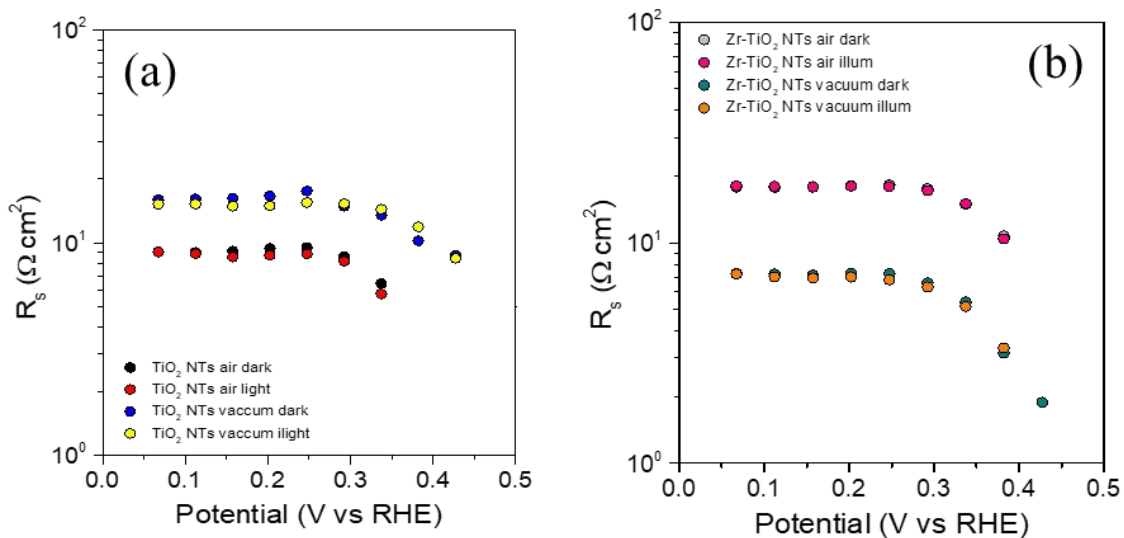

**Figure S9.-** Series resistance ( $R_s$ ) for  $\text{TiO}_2$  nanotubes thermally treated in air and vacuum (a) bare (b) Zr-doped.

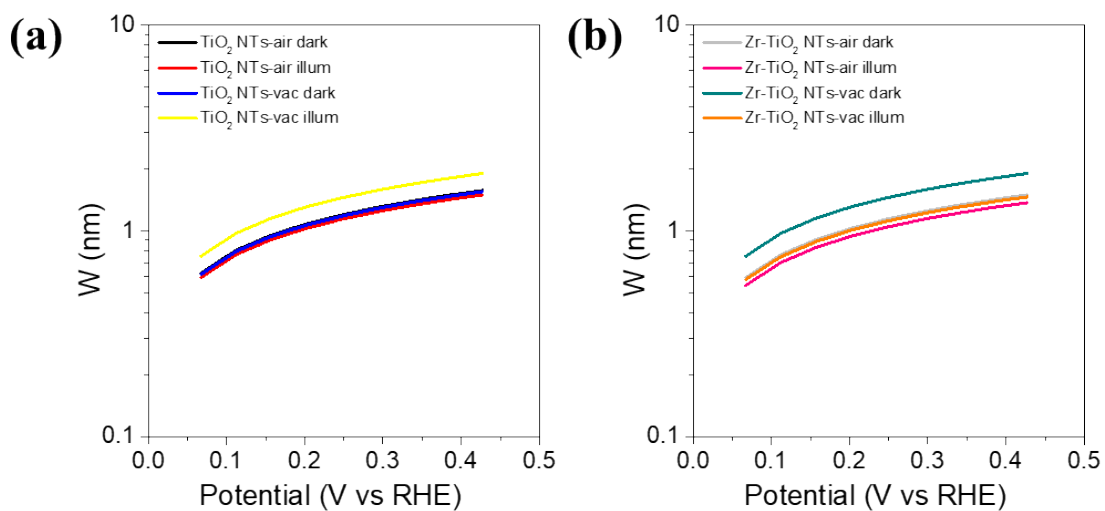

**Figure S10.-** Calculation of the space charge zone ( $w$ ) for  $\text{TiO}_2$  nanotubes (a) bare and (b) Zr-doped, thermally treated in air and in vacuum.
